# Supplementary material for: Factors mediating HIV risk among female sex workers in Europe: a systematic review and ecological analysis
Source: HighWire-hosted journal article supplement (doi:10.1136/bmjopen-2013-002836), 2013-07-01
Supplement: bmjopen-2013-002836supp_appendix.pdf [file bmjopen-2013-002836supp_appendix.pdf]

Table 3: Summary of structural indicators examined in ecological analysis (Web appendix)

| Country             | Gini Coefficient <sup>1</sup> | Pay differential <sup>2</sup> | Prison population per 100,000 <sup>3</sup> | Services per 1000 FSWs <sup>4</sup> |
|---------------------|-------------------------------|-------------------------------|--------------------------------------------|-------------------------------------|
| Austria             | 0.291                         | 0.4                           | 100                                        | 1.1                                 |
| Belgium             | 0.33                          | 0.64                          | 89                                         | 0.94                                |
| France              | 0.327                         | 0.61                          | 93                                         | 0.37                                |
| Germany             | 0.283                         | 0.59                          | 98                                         | 0.18                                |
| Greece              | 0.343                         | 0.51                          | 80                                         | 0.8                                 |
| Italy               | 0.36                          | 0.51                          | 100                                        | 0.56                                |
| Netherlands         | 0.31                          | 0.67                          | 100                                        | 0.88                                |
| Norway              | 0.258                         | 0.77                          | 59                                         | 3.52                                |
| Portugal            | 0.385                         | 0.6                           | 137                                        | 1.34                                |
| Spain               | 0.35                          | 0.52                          | 138                                        | 0.16                                |
| Sweden              | 0.25                          | 0.67                          | 73                                         | N/A                                 |
| UK                  | 0.36                          | 0.67                          | 125                                        | 0.72                                |
| <b>Total West</b>   | <b>0.33</b>                   | <b>0.61</b>                   | <b>99</b>                                  | <b>0.80</b>                         |
| Albania             | 0.33                          | 0.54                          | 90                                         | 0.69                                |
| Bosnia/Herzegovina  | 0.363                         | 0.61                          | 60                                         | 0.6                                 |
| Bulgaria            | 0.292                         | 0.68                          | 134                                        | 1                                   |
| Croatia             | 0.29                          | 0.67                          | 59                                         | 1.2                                 |
| Czech Republic      | 0.258                         | 0.57                          | 170                                        | 0.22                                |
| Hungary             | 0.3                           | 0.75                          | 165                                        | 0.39                                |
| Israel              | 0.392                         | 0.58                          | 163                                        | N/A                                 |
| Macedonia           | 0.428                         | 0.49                          | 61                                         | 0.49                                |
| Montenegro          | 0.369                         | 0.58                          | 104                                        | 0.78                                |
| Poland              | 0.349                         | 0.59                          | 218                                        | 0.26                                |
| Romania             | 0.321                         | 0.68                          | 200                                        | 0.31                                |
| Serbia              | 0.28                          | 0.59                          | 69                                         | 0.27                                |
| Turkey              | 0.412                         | 0.26                          | 92                                         | N/A                                 |
| <b>Total Centre</b> | <b>0.33</b>                   | <b>0.59</b>                   | <b>104</b>                                 | <b>0.49</b>                         |
| Armenia             | 0.30                          | 0.57                          | 135                                        | 0.93                                |
| Azerbaijan          | 0.17                          | 0.44                          | 217                                        | 0.55                                |
| Belarus             | 0.29                          | 0.63                          | 554                                        | 0.39                                |
| Estonia             | 0.36                          | 0.65                          | 361                                        | 2.19                                |
| Georgia             | 0.41                          | 0.38                          | 198                                        | 0.62                                |
| Kazakhstan          | 0.31                          | 0.64                          | 522                                        | 1.47                                |
| Kyrgyzstan          | 0.36                          | 0.55                          | 390                                        | 0.91                                |
| Latvia              | 0.36                          | 0.67                          | 352                                        | 0.27                                |
| Lithuania           | 0.36                          | 0.7                           | 266                                        | 1.62                                |
| Moldova             | 0.37                          | 0.73                          | 301                                        | N/A                                 |
| Russia              | 0.44                          | 0.64                          | 606                                        | 0.09                                |
| Tajikistan          | 0.34                          | 0.65                          | 159                                        | 2                                   |
| Ukraine             | 0.28                          | 0.59                          | 415                                        | 0.52                                |
| Uzbekistan          | 0.37                          | 0.64                          | 184                                        | 1.17                                |
| <b>Total East</b>   | <b>0.35</b>                   | <b>0.64</b>                   | <b>326.5</b>                               | <b>0.91</b>                         |

N/A =Not available

1. Gini coefficient <http://search.worldba..org/>

2. The indicator is based on the ratio of female to male earned income as defined. These data are derived from the ratio of the female to male non-agricultural wages, the female and male shares of the economically active population, total female and male population and total GDP. Human Development Report 2009: Overcoming barriers: Human mobility and development - HDR 2009 Statistical tables li.:

<http://hdr.undp.org/en/reports/global/hdr2009/> (accessed 08.12.2010)

3. Walmsley, R., *World Prison Population List (7th edition)*, 2009, International Centre for Prison Studies.

4. Services offered include a wide range of sexual health, social support and legal services and excludes standard STI clinics and health services that treat non-sex working populations. Data collected from: [services4sexworkers.org](http://services4sexworkers.org); Global Fund; International AIDS Alliance; TAMPEP
